# Supplementary material
Source: publisher site journal article supplement (https://www.spandidos-publications.com/2422/downloadSupplementary)
Supplement: Supplementary file 1 [file downloadSupplementary]

## Sheet: 差异蛋白详情表
Table SII. Detailed table of difference protein between GEO and control group.
Accession	Description	FC(GEO/C)	Log2FC(GEO/C)	P_value(GEO/C)	Regulate	Significant	GEO	C	GO Term	GO ID	KO ID	KO Name	Pathway ID	Pathway_defition	COG ID	COG_Functional Categories	Pfam ID	Domain	Domain Description	Subcellular Loc	Unique Peptides	Coverage（%）	MW [kDa]	FDR Confidence
B5MBW9	Coiled-coil-helix-coiled-coil-helix domain-containing protein 10, mitochondrial OS=Homo sapiens OX=9606 GN=CHCHD10 PE=1 SV=1	1.7116	0.775349	0.04081	up	yes	2.006	1.172	BP:purine ribonucleoside monophosphate metabolic process;BP:nucleotide biosynthetic process;BP:small molecule metabolic process;BP:ribonucleoside monophosphate metabolic process;BP:organic cyclic compound biosynthetic process;BP:purine nucleoside biosynthetic process;BP:purine ribonucleoside monophosphate biosynthetic process;BP:mitochondrion organization;BP:single-organism metabolic process;BP:s…	GO:0009167;GO:0009165;GO:0044281;GO:0009161;GO:1901362;GO:0042451;GO:0009168;GO:0007005;GO:0044710;GO:0044711;GO:0071840;GO:0009199;GO:0044092;GO:2000984;GO:2000983;GO:0009206;GO:0009205;GO:0009201;GO:0046034;GO:0046129;GO:0046128;GO:0042455;GO:0046483;GO:1901564;GO:1901566;GO:0006163;GO:0006164;GO:0019637;GO:0019438;GO:0006119;GO:0009163;GO:0009141;GO:0009142;GO:0009144;GO:0009145;GO:0006807;GO:…	------	------	------	------	------	------	PF06747.10	CHCH	CHCH domain	mitochondrial	1	15	14.9	High
Q71U36	Tubulin alpha-1A chain OS=Homo sapiens OX=9606 GN=TUBA1A PE=1 SV=1	1.64184	0.715317	0.03476	up	yes	1.852	1.128	BP:regulation of metabolic process;BP:G2/M transition of mitotic cell cycle;BP:signal transduction;BP:organic cyclic compound biosynthetic process;BP:cellular component organization or biogenesis;BP:regulation of primary metabolic process;BP:positive regulation of biological process;BP:regulation of macromolecule metabolic process;BP:regulation of RNA biosynthetic process;BP:heterocycle metabolic…	GO:0019222;GO:0000086;GO:0007165;GO:1901362;GO:0071840;GO:0080090;GO:0048518;GO:0060255;GO:2001141;GO:0046483;GO:0006355;GO:0050789;GO:0009893;GO:0009891;GO:0035556;GO:0097711;GO:1901576;GO:0007346;GO:0044260;GO:0018130;GO:0016043;GO:0065007;GO:1901360;GO:0006810;GO:0009889;GO:0050794;GO:0008150;GO:0008152;GO:0019438;GO:0034654;GO:0051234;GO:0010604;GO:0016070;GO:0044271;GO:0046907;GO:1901987;GO:…	K07374	TUBA	hsa04530;hsa04210;hsa05130;hsa04145;hsa04540	Tight junction;Apoptosis;Pathogenic Escherichia coli infection;Phagosome;Gap junction	COG5023	Z:Cytoskeleton	PF00091.22;PF03953.14	Tubulin;Tubulin_C	Tubulin/FtsZ family, GTPase domain;Tubulin C-terminal domain	cytoplasmic	1	83	50.1	High
O14494	Phospholipid phosphatase 1 OS=Homo sapiens OX=9606 GN=PLPP1 PE=1 SV=1	1.44722	0.533281	0.01061	up	yes	1.508	1.042	BP:regulation of primary metabolic process;BP:regulation of metabolic process;BP:protein dephosphorylation;BP:establishment of skin barrier;BP:signal transduction;BP:hormone-mediated signaling pathway;BP:single-organism metabolic process;BP:single-organism biosynthetic process;BP:rhythmic process;BP:negative regulation of biological process;BP:sphingolipid metabolic process;BP:regulation of cell …	GO:0080090;GO:0019222;GO:0006470;GO:0061436;GO:0007165;GO:0009755;GO:0044710;GO:0044711;GO:0048511;GO:0048519;GO:0006665;GO:0042127;GO:0030518;GO:1901564;GO:0010033;GO:0098742;GO:0051704;GO:0044703;GO:0044702;GO:0048871;GO:0044707;GO:0048870;GO:0019538;GO:0044706;GO:0007205;GO:0048878;GO:0007565;GO:0019637;GO:0006928;GO:0014070;GO:0006807;GO:0050789;GO:0044267;GO:0044260;GO:0019216;GO:0065007;GO:…	K01080	PPAP2	hsa00561;hsa04975;hsa00565;hsa00564;hsa00600;hsa04072;hsa05231;hsa04666	Glycerolipid metabolism;Fat digestion and absorption;Ether lipid metabolism;Glycerophospholipid metabolism;Sphingolipid metabolism;Phospholipase D signaling pathway;Choline metabolism in cancer;Fc gamma R-mediated phagocytosis	COG0671	I:Lipid transport and metabolism	PF01569.18	PAP2	PAP2 superfamily	ER	1	7	32.1	High
B4DEE8	Methylated-DNA--protein-cysteine methyltransferase OS=Homo sapiens OX=9606 GN=MGMT PE=1 SV=1	1.40882	0.494491	0.03158	up	yes	1.437	1.02	BP:protein localization;BP:regulation of primary metabolic process;BP:regulation of metabolic process;BP:positive regulation of response to stimulus;BP:regulation of response to stimulus;BP:single-organism metabolic process;BP:organic cyclic compound metabolic process;BP:DNA dealkylation involved in DNA repair;BP:DNA methylation;BP:DNA alkylation;BP:DNA modification;BP:positive regulation of macr…	GO:0008104;GO:0080090;GO:0019222;GO:0048584;GO:0048583;GO:0044710;GO:1901360;GO:0006307;GO:0006306;GO:0006305;GO:0006304;GO:0010604;GO:0048869;GO:0071310;GO:0006266;GO:0030855;GO:0043281;GO:0048519;GO:0051054;GO:0006282;GO:0051052;GO:0006281;GO:0060255;GO:0060548;GO:0051593;GO:0030162;GO:2001020;GO:2001022;GO:0010033;GO:0046483;GO:0071214;GO:0043200;GO:0009605;GO:0010243;GO:0031667;GO:0033554;GO:…	K00567	ogt, MGMT	------	------	COG0350	L:Replication, recombination and repair	PF01035.17;PF02870.12	DNA_binding_1;Methyltransf_1N	6-O-methylguanine DNA methyltransferase, DNA binding domain;6-O-methylguanine DNA methyltransferase, ribonuclease-like domain	mitochondrial	1	8	25	Medium
H9KV75	Alpha-actinin-1 OS=Homo sapiens OX=9606 GN=ACTN1 PE=1 SV=1	1.43423	0.520277	0.04135	up	yes	1.412	0.9845	BP:regulation of metabolic process;BP:regulation of RNA biosynthetic process;BP:platelet formation;BP:cellular component organization or biogenesis;BP:cellular developmental process;BP:negative regulation of biological process;BP:cellular component assembly;BP:regulation of macromolecule metabolic process;BP:vesicle-mediated transport;BP:cell-substrate junction assembly;BP:secretion by cell;BP:si…	GO:0019222;GO:2001141;GO:0030220;GO:0071840;GO:0048869;GO:0048519;GO:0022607;GO:0060255;GO:0016192;GO:0007044;GO:0032940;GO:0098602;GO:0042981;GO:0050789;GO:0006887;GO:0016043;GO:0045055;GO:0065007;GO:0048646;GO:0006810;GO:0098609;GO:0009889;GO:0050794;GO:0008150;GO:0051764;GO:0051234;GO:0046903;GO:0010556;GO:0061572;GO:0030154;GO:0007045;GO:0044699;GO:0034333;GO:0031326;GO:0022610;GO:0032502;GO:…	------	------	------	------	COG5069	Z:Cytoskeleton	PF00435.18;PF00307.28;PF08726.7;PF00036.29;PF13499.3	Spectrin;CH;EFhand_Ca_insen;EF-hand_1;EF-hand_7	Spectrin repeat;Calponin homology;Ca2+ insensitive EF hand;EF hand;EF-hand domain pair	cytoplasmic	1	63	94.8	High
P02649	Apolipoprotein E OS=Homo sapiens OX=9606 GN=APOE PE=1 SV=1	1.34303	0.425491	0.0495	up	yes	1.339	0.997	BP:regulation of membrane protein ectodomain proteolysis;BP:positive regulation of membrane protein ectodomain proteolysis;BP:regulation of transport;BP:small molecule metabolic process;BP:small molecule catabolic process;BP:small molecule biosynthetic process;BP:inorganic ion homeostasis;BP:regulation of inclusion body assembly;BP:negative regulation of phospholipid transport;BP:regulation of ph…	GO:0051043;GO:0051044;GO:0051049;GO:0044281;GO:0044282;GO:0044283;GO:0098771;GO:0090083;GO:2001139;GO:2001138;GO:0051651;GO:1903000;GO:0035640;GO:0051716;GO:0035641;GO:0016101;GO:0044794;GO:0031102;GO:0060548;GO:0045859;GO:0046486;GO:1903002;GO:2000644;GO:0042325;GO:0042326;GO:0010632;GO:0010633;GO:0019538;GO:0009896;GO:0009894;GO:0009892;GO:0009893;GO:0009890;GO:0009891;GO:0090261;GO:0000302;GO:…	K04524	APOE	hsa05010	Alzheimer's disease	------	------	PF01442.15	Apolipoprotein	Apolipoprotein A1/A4/E domain	extracellular	4	12	36.1	High
Q03468	DNA excision repair protein ERCC-6 OS=Homo sapiens OX=9606 GN=ERCC6 PE=1 SV=1	1.29773	0.375985	0.02144	up	yes	1.312	1.011	BP:regulation of phosphate metabolic process;BP:regulation of primary metabolic process;BP:developmental growth;BP:regulation of cellular macromolecule biosynthetic process;BP:positive regulation of response to stimulus;BP:regulation of response to stimulus;BP:activation of protein kinase activity;BP:signal transduction;BP:multicellular organism growth;BP:organic cyclic compound biosynthetic proc…	GO:0019220;GO:0080090;GO:0048589;GO:2000112;GO:0048584;GO:0048583;GO:0032147;GO:0007165;GO:0035264;GO:1901362;GO:1901360;GO:0044710;GO:0019222;GO:0009966;GO:0009967;GO:0040029;GO:0044093;GO:0048518;GO:0042325;GO:0006284;GO:0006283;GO:0006281;GO:0060255;GO:0045859;GO:0032784;GO:0032786;GO:0046330;GO:2001141;GO:0010035;GO:0046483;GO:0042327;GO:0044707;GO:0044249;GO:0050731;GO:0050730;GO:0033554;GO:…	K10841	ERCC6, CSB, RAD26	hsa03420	Nucleotide excision repair	------	------	PF00176.20;PF00271.28	SNF2_N;Helicase_C	SNF2 family N-terminal domain;Helicase conserved C-terminal domain	nuclear	1	1	168.3	High
Q9NUQ7	Ufm1-specific protease 2 OS=Homo sapiens OX=9606 GN=UFSP2 PE=1 SV=3	1.28827	0.365435	0.01323	up	yes	1.296	1.006	BP:regulation of response to stimulus;BP:regulation of signaling;BP:regulation of cell communication;BP:regulation of signal transduction;BP:regulation of biological process;BP:organic substance metabolic process;BP:biological regulation;BP:proteolysis;BP:regulation of intracellular estrogen receptor signaling pathway;BP:regulation of intracellular steroid hormone receptor signaling pathway;BP:re…	GO:0048583;GO:0023051;GO:0010646;GO:0009966;GO:0050789;GO:0071704;GO:0065007;GO:0006508;GO:0033146;GO:0033143;GO:0050794;GO:0008150;GO:0008152;GO:0044238;GO:0019538;GO:0043170;GO:0005783;GO:0043229;GO:0043228;GO:0043227;GO:0043226;GO:0005737;GO:0044446;GO:0005730;GO:0005634;GO:0043234;GO:0032991;GO:0043231;GO:0043232;GO:0005829;GO:0044464;GO:0005575;GO:0044444;GO:0044428;GO:0044424;GO:0044422;GO:…	K01376	UFSP2	------	------	------	------	PF07910.10	Peptidase_C78	Peptidase family C78	cytoplasmic	1	4	53.2	High
Q86TB9	Protein PAT1 homolog 1 OS=Homo sapiens OX=9606 GN=PATL1 PE=1 SV=2	1.26825	0.342833	0.006034	up	yes	1.286	1.014	BP:organic cyclic compound metabolic process;BP:organic cyclic compound catabolic process;BP:organic substance metabolic process;BP:heterocycle metabolic process;BP:aromatic compound catabolic process;BP:cellular component assembly;BP:nitrogen compound metabolic process;BP:cellular macromolecule metabolic process;BP:cellular component organization;BP:macromolecular complex assembly;BP:cellular co…	GO:1901360;GO:1901361;GO:0071704;GO:0046483;GO:0019439;GO:0022607;GO:0006807;GO:0044260;GO:0016043;GO:0065003;GO:0071840;GO:0046700;GO:0008150;GO:0008152;GO:0034655;GO:0016070;GO:0016071;GO:0044270;GO:0044248;GO:0034641;GO:0006139;GO:0022618;GO:0033962;GO:0009987;GO:0006725;GO:0043928;GO:0000291;GO:0000290;GO:0043170;GO:0000956;GO:0043933;GO:0090304;GO:0034622;GO:0071826;GO:0006401;GO:0006402;GO:…	K12617	PATL1, PAT1	hsa03018	RNA degradation	------	------	PF09770.6	PAT1	Topoisomerase II-associated protein PAT1	cytoplasmic	1	3	86.8	High
P08236	Beta-glucuronidase OS=Homo sapiens OX=9606 GN=GUSB PE=1 SV=2	1.23809	0.308122	0.001275	up	yes	1.248	1.008	BP:nucleobase-containing compound metabolic process;BP:organic cyclic compound biosynthetic process;BP:organic cyclic compound metabolic process;BP:single-organism catabolic process;BP:single-organism metabolic process;BP:biological regulation;BP:hyaluronan metabolic process;BP:hyaluronan catabolic process;BP:heterocycle metabolic process;BP:organonitrogen compound metabolic process;BP:organonitr…	GO:0006139;GO:1901362;GO:1901360;GO:0044712;GO:0044710;GO:0065007;GO:0030212;GO:0030214;GO:0046483;GO:1901564;GO:1901565;GO:0002274;GO:0002376;GO:0019438;GO:0030203;GO:0045321;GO:0006807;GO:0051179;GO:1901576;GO:1901575;GO:0006887;GO:0045055;GO:0002366;GO:0006367;GO:0018130;GO:0006810;GO:0050794;GO:0001775;GO:0008150;GO:0008152;GO:0034654;GO:0051234;GO:0016070;GO:0046903;GO:0044271;GO:0043312;GO:…	K01195	uidA, GUSB	hsa00983;hsa00860;hsa04142;hsa00040;hsa00531	Drug metabolism - other enzymes;Porphyrin and chlorophyll metabolism;Lysosome;Pentose and glucuronate interconversions;Glycosaminoglycan degradation	COG3250	G:Carbohydrate transport and metabolism	PF02836.14;PF02837.15;PF00703.18	Glyco_hydro_2_C;Glyco_hydro_2_N;Glyco_hydro_2	Glycosyl hydrolases family 2, TIM barrel domain;Glycosyl hydrolases family 2, sugar binding domain;Glycosyl hydrolases family 2	lysosomal	2	5	74.7	High
Q96F63	Coiled-coil domain-containing protein 97 OS=Homo sapiens OX=9606 GN=CCDC97 PE=1 SV=1	1.20118	0.26445	0.03631	up	yes	1.224	1.019	CC:cellular_component;CC:macromolecular complex;CC:small nuclear ribonucleoprotein complex;CC:cell part;CC:integral component of membrane;CC:ribonucleoprotein complex;CC:intracellular organelle part;CC:intracellular ribonucleoprotein complex;CC:spliceosomal snRNP complex;CC:nuclear part;CC:intrinsic component of membrane;CC:membrane part;CC:intracellular part;CC:U2 snRNP;CC:organelle part;	GO:0005575;GO:0032991;GO:0030532;GO:0044464;GO:0016021;GO:1990904;GO:0044446;GO:0030529;GO:0097525;GO:0044428;GO:0031224;GO:0044425;GO:0044424;GO:0005686;GO:0044422	------	------	------	------	------	------	PF09747.6	DUF2052	Coiled-coil domain containing protein	cytoplasmic	3	23	38.9	High
O00194	Ras-related protein Rab-27B OS=Homo sapiens OX=9606 GN=RAB27B PE=1 SV=4	1.22034	0.287282	0.007147	up	yes	1.224	1.003	BP:regulation of secretion;BP:positive regulation of secretion;BP:regulation of transport;BP:signal transduction;BP:establishment of organelle localization;BP:pigment granule localization;BP:positive regulation of biological process;BP:positive regulation of transport;BP:vesicle-mediated transport;BP:secretion by cell;BP:intracellular signal transduction;BP:regulation of biological process;BP:exo…	GO:0051046;GO:0051047;GO:0051049;GO:0007165;GO:0051656;GO:0051875;GO:0048518;GO:0051050;GO:0016192;GO:0032940;GO:0035556;GO:0050789;GO:0006887;GO:0045055;GO:0065007;GO:0071985;GO:0006810;GO:0050794;GO:0008150;GO:0051234;GO:0046903;GO:1903530;GO:1903532;GO:0044699;GO:1902578;GO:0032402;GO:0032401;GO:0032400;GO:0017157;GO:0009987;GO:0060627;GO:0032879;GO:0051650;GO:0051905;GO:0051904;GO:0045921;GO:…	K07886	RAB27B	hsa04972	Pancreatic secretion	------	------	PF00071.19;PF08477.10;PF00025.18	Ras;Roc;Arf	Ras family;Ras of Complex, Roc, domain of DAPkinase;ADP-ribosylation factor family	mitochondrial	1	5	24.6	High
Q99643	Succinate dehydrogenase cytochrome b560 subunit, mitochondrial OS=Homo sapiens OX=9606 GN=SDHC PE=1 SV=1	1.32203	0.402759	0.0329	up	yes	1.248	0.944	BP:cell projection organization;BP:carboxylic acid metabolic process;BP:neuron projection development;BP:generation of precursor metabolites and energy;BP:cellular component organization or biogenesis;BP:single-organism metabolic process;BP:tricarboxylic acid metabolic process;BP:cellular component organization;BP:organic substance metabolic process;BP:single-organism process;BP:respiratory elect…	GO:0030030;GO:0019752;GO:0031175;GO:0006091;GO:0071840;GO:0044710;GO:0072350;GO:0016043;GO:0071704;GO:0044699;GO:0022904;GO:0044763;GO:0061564;GO:0044238;GO:0022900;GO:0009987;GO:0045333;GO:0008150;GO:0008152;GO:0043436;GO:0055114;GO:0015980;GO:0006082;GO:0006099;GO:0009060;GO:0006101;GO:0044237;GO:0006121;GO:0044281;GO:0098800;GO:0099512;GO:0099513;GO:0019866;GO:0045257;GO:1990204;GO:0043226;GO:…	K00236	SDHC, SDH3	hsa00190;hsa00020;hsa01200;hsa05012;hsa05016;hsa05010;hsa04932	Oxidative phosphorylation;Citrate cycl;Carbon metabolism;Parkinson's disease;Huntington's disease;Alzheimer's disease;Non-alcoholic fatty liver diseas	COG2009	C:Energy production and conversion	PF01127.19	Sdh_cyt	Succinate dehydrogenase/Fumarate reductase transmembrane subunit	mitochondrial	1	5	18.6	Medium
Q9GZP9	Derlin-2 OS=Homo sapiens OX=9606 GN=DERL2 PE=1 SV=1	1.22112	0.288203	0.04011	up	yes	1.168	0.9565	BP:regulation of intracellular protein transport;BP:regulation of metabolic process;BP:regulation of transport;BP:regulation of intracellular transport;BP:negative regulation of intracellular transport;BP:regulation of response to stimulus;BP:behavior;BP:protein localization;BP:signal transduction;BP:negative regulation of response to endoplasmic reticulum stress;BP:regulation of primary metaboli…	GO:0033157;GO:0019222;GO:0051049;GO:0032386;GO:0032387;GO:0048583;GO:0007610;GO:0008104;GO:0007165;GO:1903573;GO:0080090;GO:0051716;GO:0006986;GO:0010605;GO:1904293;GO:1904292;GO:0048518;GO:0048519;GO:0033036;GO:0048585;GO:0042127;GO:0051051;GO:0060255;GO:0045184;GO:0030163;GO:0010033;GO:0051705;GO:0051704;GO:0070862;GO:0044248;GO:0030968;GO:0019538;GO:0033554;GO:0007631;GO:0009894;GO:0009895;GO:…	K13989	DERL2_3	hsa04141	Protein processing in endoplasmic reticulum	COG5291	S:Function unknown	PF04511.12	DER1	Der1-like family	extracellular	2	17	27.5	High
P56270	Myc-associated zinc finger protein OS=Homo sapiens OX=9606 GN=MAZ PE=1 SV=1	0.787923	-0.343874	0.04307	down	yes	0.8155	1.035	BP:regulation of primary metabolic process;BP:regulation of metabolic process;BP:signal transduction;BP:organic cyclic compound biosynthetic process;BP:organic cyclic compound metabolic process;BP:phosphorelay signal transduction system;BP:regulation of macromolecule metabolic process;BP:regulation of RNA biosynthetic process;BP:heterocycle metabolic process;BP:regulation of gene expression;BP:ar…	GO:0080090;GO:0019222;GO:0007165;GO:1901362;GO:1901360;GO:0000160;GO:0060255;GO:2001141;GO:0046483;GO:0010468;GO:0019438;GO:0006807;GO:0035556;GO:0043170;GO:0050789;GO:1901576;GO:0044260;GO:0065007;GO:0006367;GO:0006369;GO:0018130;GO:0009889;GO:0050794;GO:0008150;GO:0008152;GO:0034654;GO:0016070;GO:0044271;GO:0006355;GO:0010556;GO:0006352;GO:0032774;GO:0044249;GO:0034641;GO:0034645;GO:0006139;GO:…	------	------	------	------	COG5048	R:General function prediction only	PF13894.3;PF13465.3;PF00096.23;PF13912.3;PF12171.5	zf-C2H2_4;zf-H2C2_2;zf-C2H2;zf-C2H2_6;zf-C2H2_jaz	C2H2-type zinc finger;Zinc-finger double domain;Zinc finger, C2H2 type;C2H2-type zinc finger;Zinc-finger double-stranded RNA-binding	cytoplasmic	2	5	48.6	High
P42025	Beta-centractin OS=Homo sapiens OX=9606 GN=ACTR1B PE=1 SV=1	0.794146	-0.332523	0.01922	down	yes	0.814	1.025	BP:cell activation involved in immune response;BP:leukocyte activation involved in immune response;BP:antigen processing and presentation of peptide or polysaccharide antigen via MHC class II;BP:vesicle-mediated transport;BP:myeloid leukocyte activation;BP:immune system process;BP:myeloid cell activation involved in immune response;BP:leukocyte activation;BP:antigen processing and presentation of…	GO:0002263;GO:0002366;GO:0002504;GO:0016192;GO:0002274;GO:0002376;GO:0002275;GO:0045321;GO:0048002;GO:0002283;GO:0006887;GO:0045055;GO:0019882;GO:0019884;GO:0019886;GO:0006810;GO:0001775;GO:0008150;GO:0051234;GO:0046903;GO:0043312;GO:0002495;GO:0044699;GO:0009987;GO:0036230;GO:0032940;GO:0042119;GO:0002478;GO:0043299;GO:0044765;GO:0044763;GO:0051179;GO:1902578;GO:0002252;GO:0031974;GO:0031983;GO:…	K16575	ACTR1, ARP1	------	------	COG5277	Z:Cytoskeleton	PF00022.16	Actin	Actin	cytoplasmic	2	19	42.3	High
A5PLL7	Transmembrane protein 189 OS=Homo sapiens OX=9606 GN=TMEM189 PE=1 SV=3	0.792611	-0.335315	0.01365	down	yes	0.8045	1.015	BP:regulation of metabolic process;BP:protein acetylation;BP:internal protein amino acid acetylation;BP:cellular component organization or biogenesis;BP:regulation of primary metabolic process;BP:single-organism metabolic process;BP:peptidyl-amino acid modification;BP:protein modification by small protein conjugation;BP:animal organ development;BP:histone H3 acetylation;BP:regulation of macromole…	GO:0019222;GO:0006473;GO:0006475;GO:0071840;GO:0080090;GO:0044710;GO:0018193;GO:0032446;GO:0048513;GO:0043966;GO:0060255;GO:2001141;GO:0070647;GO:0019538;GO:0018205;GO:0016569;GO:0022607;GO:0043543;GO:0044260;GO:0016567;GO:0016043;GO:0065003;GO:0065007;GO:0016570;GO:0016573;GO:0065004;GO:0018393;GO:0018394;GO:0009889;GO:0050794;GO:0043412;GO:0036211;GO:0008150;GO:0008152;GO:0006355;GO:0010556;GO:…	K20656	TMEM189	------	------	------	------	PF10520.6	TMEM189_B_dmain	B domain of TMEM189, localisation domain	cytoplasmic	1	6	31.1	High
Q14004	Cyclin-dependent kinase 13 OS=Homo sapiens OX=9606 GN=CDK13 PE=1 SV=2	0.660813	-0.597685	0.0478	down	yes	0.715	1.082	BP:regulation of stem cell differentiation;BP:negative regulation of stem cell differentiation;BP:regulation of metabolic process;BP:regulation of cellular macromolecule biosynthetic process;BP:regulation of RNA biosynthetic process;BP:RNA splicing, via transesterification reactions with bulged adenosine as nucleophile;BP:regulation of macromolecule biosynthetic process;BP:organic cyclic compound…	GO:2000736;GO:2000737;GO:0019222;GO:2000112;GO:2001141;GO:0000377;GO:0010556;GO:1901362;GO:0080090;GO:0002263;GO:0071840;GO:0001775;GO:0044419;GO:0048513;GO:0048518;GO:0048519;GO:0046483;GO:0016192;GO:0042127;GO:0060255;GO:0071704;GO:0051704;GO:0044707;GO:0002274;GO:0000398;GO:0010468;GO:0051783;GO:0019538;GO:0010628;GO:0051252;GO:0022607;GO:0009893;GO:0009891;GO:0051254;GO:0045321;GO:0006807;GO:…	K08819	CDK12_13	------	------	------	------	PF00069.22;PF07714.14	Pkinase;Pkinase_Tyr	Protein kinase domain;Protein tyrosine kinase	nuclear	1	2	164.8	High
Q30201	Hereditary hemochromatosis protein OS=Homo sapiens OX=9606 GN=HFE PE=1 SV=1	0.768966	-0.379009	0.007325	down	yes	0.7805	1.015	BP:regulation of secretion;BP:positive regulation of secretion;BP:regulation of transport;BP:negative regulation of lymphocyte mediated immunity;BP:regulation of lymphocyte mediated immunity;BP:macromolecular complex subunit organization;BP:negative regulation of leukocyte mediated immunity;BP:regulation of leukocyte mediated immunity;BP:negative regulation of production of molecular mediator of …	GO:0051046;GO:0051047;GO:0051049;GO:0002707;GO:0002706;GO:0043933;GO:0002704;GO:0002703;GO:0002701;GO:0002700;GO:0098771;GO:0048260;GO:0002709;GO:0051716;GO:0019222;GO:0031100;GO:0002822;GO:0002823;GO:0002820;GO:0065009;GO:0042325;GO:0042327;GO:0009605;GO:0009894;GO:0009895;GO:0009892;GO:0009893;GO:0010862;GO:0050789;GO:0032091;GO:0032092;GO:0002682;GO:0002683;GO:2000273;GO:2000272;GO:0019882;GO:…	------	------	------	------	------	------	PF00129.15;PF07654.12;PF16497.2	MHC_I;C1-set;MHC_I_3	Class I Histocompatibility antigen, domains alpha 1 and 2;Immunoglobulin C1-set domain;MHC-I family domain	lysosomal	1	4	40.1	High
Q6DKK2	Tetratricopeptide repeat protein 19, mitochondrial OS=Homo sapiens OX=9606 GN=TTC19 PE=1 SV=4	0.738603	-0.437128	0.02356	down	yes	0.7615	1.031	BP:cellular component assembly;BP:mitochondrial respiratory chain complex assembly;BP:macromolecular complex subunit organization;BP:cytochrome complex assembly;BP:nucleic acid metabolic process;BP:cell division;BP:cellular macromolecular complex assembly;BP:cellular component organization or biogenesis;BP:ncRNA metabolic process;BP:macromolecular complex assembly;BP:cell cycle;BP:cellular compon…	GO:0022607;GO:0033108;GO:0043933;GO:0017004;GO:0090304;GO:0051301;GO:0034622;GO:0071840;GO:0034660;GO:0065003;GO:0007049;GO:0016043;GO:0044710;GO:0044260;GO:1901360;GO:0070271;GO:0071704;GO:0044699;GO:0034551;GO:0006364;GO:0016070;GO:0006461;GO:0034470;GO:0006139;GO:0009987;GO:0006725;GO:0006396;GO:0008150;GO:0008152;GO:0043623;GO:0055114;GO:0046483;GO:0000910;GO:0044238;GO:0016072;GO:0097033;GO:…	K18169	TTC19	------	------	COG0457	R:General function prediction only	PF13424.3;PF13374.3;PF07719.14;PF00515.25	TPR_12;TPR_10;TPR_2;TPR_1	Tetratricopeptide repeat;Tetratricopeptide repeat;Tetratricopeptide repeat;Tetratricopeptide repeat	mitochondrial	1	5	42.4	High
O95167	NADH dehydrogenase [ubiquinone] 1 alpha subcomplex subunit 3 OS=Homo sapiens OX=9606 GN=NDUFA3 PE=1 SV=1	0.77855	-0.361138	0.003859	down	yes	0.784	1.007	BP:protein localization;BP:membrane organization;BP:signal transduction;BP:cell surface receptor signaling pathway;BP:cellular component organization or biogenesis;BP:single-organism catabolic process;BP:cellular response to stimulus;BP:NADH dehydrogenase complex assembly;BP:autophagosome organization;BP:electron transport chain;BP:respiratory electron transport chain;BP:macromolecule localizatio…	GO:0008104;GO:0061024;GO:0007165;GO:0007166;GO:0071840;GO:0044712;GO:0051716;GO:0010257;GO:1905037;GO:0022900;GO:0022904;GO:0033036;GO:0097576;GO:0071702;GO:0006605;GO:0045184;GO:0055114;GO:0044700;GO:0031668;GO:0031669;GO:0031667;GO:0098916;GO:0033554;GO:0009056;GO:0022607;GO:1903008;GO:0000226;GO:0006886;GO:0016043;GO:0065003;GO:0065007;GO:0044699;GO:0006810;GO:0044710;GO:0050794;GO:0006950;GO:…	K03947	NDUFA3	hsa00190;hsa04723;hsa04932;hsa05016;hsa05010;hsa05012	Oxidative phosphorylation;Retrograde endocannabinoid signaling;Non-alcoholic fatty liver diseas;Huntington's disease;Alzheimer's disease;Parkinson's disease	------	------	PF14987.3	NADHdh_A3	NADH dehydrogenase 1 alpha subcomplex subunit 3	cytoplasmic	1	29	9.3	Medium
P00747	Plasminogen OS=Homo sapiens OX=9606 GN=PLG PE=1 SV=2	0.776441	-0.365052	0.000131	down	yes	0.7745	0.9975	BP:hemostasis;BP:negative regulation of response to stimulus;BP:blood coagulation;BP:regulation of response to stimulus;BP:tissue remodeling;BP:negative regulation of cell adhesion;BP:cellular component organization or biogenesis;BP:positive regulation of response to external stimulus;BP:single-organism metabolic process;BP:regulation of localization;BP:positive regulation of immune system proces…	GO:0007599;GO:0048585;GO:0007596;GO:0048583;GO:0048771;GO:0007162;GO:0071840;GO:0032103;GO:0044710;GO:0032879;GO:0002684;GO:0044419;GO:0002366;GO:0051817;GO:0048519;GO:0042127;GO:0048584;GO:0043535;GO:0051702;GO:0051704;GO:0010634;GO:0016192;GO:0044707;GO:0019538;GO:0002275;GO:0002376;GO:0030198;GO:0030194;GO:0002274;GO:0050820;GO:0032940;GO:0050789;GO:0044267;GO:0044260;GO:0006887;GO:0016043;GO:…	K01315	PLG	hsa05164;hsa04080;hsa04610;hsa05150	Influenza A;Neuroactive ligand-receptor interaction;Complement and coagulation cascades;Staphylococcus aureus infection	COG5640	O:Posttranslational modification, protein turnover, chaperones	PF00051.15;PF00089.23;PF00024.23;PF13365.3;PF09342.8	Kringle;Trypsin;PAN_1;Trypsin_2;DUF1986	Kringle domain;Trypsin;PAN domain;Trypsin-like peptidase domain;Domain of unknown function	plasma membrane	2	3	90.5	High
Q15154	Pericentriolar material 1 protein OS=Homo sapiens OX=9606 GN=PCM1 PE=1 SV=5	0.775213	-0.367335	0.001362	down	yes	0.7725	0.9965	BP:regulation of intracellular protein transport;BP:protein localization;BP:positive regulation of intracellular transport;BP:G2/M transition of mitotic cell cycle;BP:regulation of transport;BP:regulation of intracellular transport;BP:behavior;BP:protein localization to centrosome;BP:cellular developmental process;BP:cellular component organization or biogenesis;BP:protein transport along microtu…	GO:0033157;GO:0008104;GO:0032388;GO:0000086;GO:0051049;GO:0032386;GO:0007610;GO:0071539;GO:0048869;GO:0071840;GO:0098840;GO:0010721;GO:0048518;GO:0048519;GO:0033036;GO:0031503;GO:0051050;GO:0035176;GO:0051297;GO:0045184;GO:0022027;GO:0051703;GO:0051705;GO:0051704;GO:1903827;GO:0044707;GO:0048870;GO:0007044;GO:0098727;GO:1901990;GO:0022607;GO:0060341;GO:0006928;GO:0030705;GO:0050789;GO:0097711;GO:…	K16537	PCM1	------	------	------	------	PF15717.2	PCM1_C	Pericentriolar material 1 C terminus	cytoplasmic	3	4	228.4	High
Q9P0M6	Core histone macro-H2A.2 OS=Homo sapiens OX=9606 GN=H2AFY2 PE=1 SV=3	0.8	-0.321928	0.01685	down	yes	0.786	0.9825	BP:regulation of primary metabolic process;BP:regulation of metabolic process;BP:macromolecular complex subunit organization;BP:signal transduction;BP:cell surface receptor signaling pathway;BP:macromolecular complex assembly;BP:cellular response to stimulus;BP:negative regulation of macromolecule metabolic process;BP:regulation of gene expression, epigenetic;BP:gene silencing;BP:animal organ dev…	GO:0080090;GO:0019222;GO:0043933;GO:0007165;GO:0007166;GO:0065003;GO:0051716;GO:0010605;GO:0040029;GO:0016458;GO:0048513;GO:0030856;GO:0048518;GO:0048519;GO:0030858;GO:0016479;GO:0044700;GO:0060255;GO:0045184;GO:2001141;GO:0010033;GO:0009892;GO:0009890;GO:0050789;GO:0097396;GO:0097398;GO:0016043;GO:0065007;GO:0071840;GO:0065004;GO:0006334;GO:0034097;GO:0050793;GO:0009889;GO:0050794;GO:0006952;GO:…	K11251	H2A	hsa05322;hsa05034	Systemic lupus erythematosus;Alcoholism	COG2110;COG5262	R:General function prediction only;B:Chromatin structure and dynamics	PF01661.18;PF16211.2;PF00125.21	Macro;Histone_H2A_C;Histone	Macro domain;C-terminus of histone H2A;Core histone H2A/H2B/H3/H4	mitochondrial	1	9	40	High
O00443	Phosphatidylinositol 4-phosphate 3-kinase C2 domain-containing subunit alpha OS=Homo sapiens OX=9606 GN=PIK3C2A PE=1 SV=2	0.766	-0.384584	0.041	down	yes	0.766	1	BP:vesicle coating;BP:membrane organization;BP:muscle system process;BP:circulatory system process;BP:positive regulation of sprouting angiogenesis;BP:signal transduction;BP:cell surface receptor signaling pathway;BP:enzyme linked receptor protein signaling pathway;BP:vascular process in circulatory system;BP:transmembrane receptor protein tyrosine kinase signaling pathway;BP:cellular component o…	GO:0006901;GO:0061024;GO:0003012;GO:0003013;GO:1903672;GO:0007165;GO:0007166;GO:0007167;GO:0003018;GO:0007169;GO:0071840;GO:0065003;GO:0044710;GO:0044711;GO:0048518;GO:0006661;GO:0003008;GO:0014829;GO:0006936;GO:0006939;GO:0043536;GO:0043535;GO:0046488;GO:0046486;GO:0016192;GO:0065008;GO:0010632;GO:0048870;GO:0051094;GO:0048268;GO:0016050;GO:0051272;GO:0019637;GO:0022607;GO:1903670;GO:0022603;GO:…	K00923	PIK3C2	hsa00562;hsa04070	Inositol phosphate metabolism;Phosphatidylinositol signaling system	COG5032;COG5032;COG5032;COG5032;COG5032	D:Cell cycle control, cell division, chromosome partitioning;B:Chromatin structure and dynamics;L:Replication, recombination and repair;T:Signal transduction mechanisms;U:Intracellular trafficking, secretion, and vesicular transport	PF00454.24;PF00613.17;PF00792.21;PF00794.15;PF00787.21;PF00168.27	PI3_PI4_kinase;PI3Ka;PI3K_C2;PI3K_rbd;PX;C2	Phosphatidylinositol 3- and 4-kinase;Phosphoinositide 3-kinase family, accessory domain;Phosphoinositide 3-kinase C2;PI3-kinase family, ras-binding domain;PX domain;C2 domain	cytoplasmic	1	1	190.6	Medium
Q9BXP2	Solute carrier family 12 member 9 OS=Homo sapiens OX=9606 GN=SLC12A9 PE=1 SV=1	0.737438	-0.439406	0.003435	down	yes	0.7485	1.015	BP:anion transport;BP:chloride transport;BP:single-organism process;BP:establishment of localization;BP:cellular potassium ion transport;BP:potassium ion transmembrane transport;BP:transmembrane transport;BP:biological_process;BP:inorganic cation transmembrane transport;BP:inorganic anion transmembrane transport;BP:inorganic ion transmembrane transport;BP:inorganic anion transport;BP:monovalent i…	GO:0006820;GO:0006821;GO:0044699;GO:0051234;GO:0071804;GO:0071805;GO:0055085;GO:0008150;GO:0098662;GO:0098661;GO:0098660;GO:0015698;GO:0015672;GO:1902476;GO:0009987;GO:0006813;GO:0006812;GO:0006811;GO:0006810;GO:0034220;GO:0044765;GO:0044763;GO:0098656;GO:0051179;GO:1902578;GO:0030001;GO:0098655;GO:0005886;GO:0005634;GO:0043227;GO:0043226;GO:0005737;GO:0070062;GO:0016021;GO:0016020;GO:0044425;GO:…	K14429	SLC12A9, CCC6	------	------	COG0531	E:Amino acid transport and metabolism	PF00324.18;PF03522.12	AA_permease;SLC12	Amino acid permease;Solute carrier family 12	plasma membrane	1	2	96	High
Q99856	AT-rich interactive domain-containing protein 3A OS=Homo sapiens OX=9606 GN=ARID3A PE=1 SV=2	0.717836	-0.478273	0.04332	down	yes	0.7365	1.026	BP:regulation of primary metabolic process;BP:regulation of metabolic process;BP:signal transduction;BP:signal transduction involved in mitotic DNA damage checkpoint;BP:signal transduction involved in mitotic DNA integrity checkpoint;BP:intracellular signal transduction involved in G1 DNA damage checkpoint;BP:organic cyclic compound biosynthetic process;BP:organic cyclic compound metabolic proces…	GO:0080090;GO:0019222;GO:0007165;GO:1902402;GO:1902403;GO:1902400;GO:1901362;GO:1901360;GO:0051716;GO:2000134;GO:0045787;GO:0072422;GO:0048518;GO:0048519;GO:0060255;GO:2001141;GO:0072413;GO:0055114;GO:0046483;GO:0033554;GO:0019438;GO:0051252;GO:0009893;GO:0009891;GO:0051254;GO:0035556;GO:0050789;GO:0097659;GO:1901576;GO:0007346;GO:0044260;GO:0065007;GO:0006366;GO:0018130;GO:0009889;GO:0044710;GO:…	------	------	------	------	------	------	PF01388.18	ARID	ARID/BRIGHT DNA binding domain	cytoplasmic	1	3	62.9	Medium
Q15022	Polycomb protein SUZ12 OS=Homo sapiens OX=9606 GN=SUZ12 PE=1 SV=3	0.785061	-0.349123	0.01393	down	yes	0.7725	0.984	BP:protein methylation;BP:regulation of primary metabolic process;BP:regulation of metabolic process;BP:nucleobase-containing compound metabolic process;BP:organic cyclic compound biosynthetic process;BP:cellular component organization or biogenesis;BP:RNA biosynthetic process;BP:single-organism metabolic process;BP:negative regulation of cell cycle;BP:protein modification by small protein conjug…	GO:0006479;GO:0080090;GO:0019222;GO:0006139;GO:1901362;GO:0071840;GO:0032774;GO:0044710;GO:0045786;GO:0070647;GO:0040029;GO:0018193;GO:0032446;GO:0048518;GO:0048519;GO:0042127;GO:0016571;GO:0060255;GO:0070734;GO:2001141;GO:0007076;GO:0010032;GO:0046483;GO:0044702;GO:0044249;GO:0019538;GO:0016567;GO:0019438;GO:0016569;GO:0071103;GO:0009892;GO:0009890;GO:0018022;GO:0010629;GO:0050789;GO:0044267;GO:…	K11463	SUZ12	------	------	------	------	PF09733.6	VEFS-Box	VEFS-Box of polycomb protein	nuclear	2	4	83	High
Q17RY6	Lymphocyte antigen 6K OS=Homo sapiens OX=9606 GN=LY6K PE=1 SV=2	0.754377	-0.406642	0.03066	down	yes	0.754	0.9995	BP:regulation of metabolic process;BP:regulation of cellular macromolecule biosynthetic process;BP:regulation of neuron apoptotic process;BP:negative regulation of neuron apoptotic process;BP:signal transduction;BP:cell surface receptor signaling pathway;BP:regulation of primary metabolic process;BP:response to amino acid;BP:cellular response to stimulus;BP:negative regulation of macromolecule me…	GO:0019222;GO:2000112;GO:0043523;GO:0043524;GO:0007165;GO:0007166;GO:0080090;GO:0043200;GO:0051716;GO:0010605;GO:0010608;GO:0043067;GO:0007215;GO:0048519;GO:0060255;GO:0060548;GO:0031669;GO:0010033;GO:0031668;GO:0010243;GO:0031667;GO:0010468;GO:0033554;GO:0009892;GO:0009890;GO:0050789;GO:0071453;GO:0065007;GO:0044699;GO:0009719;GO:0009889;GO:0050794;GO:0006950;GO:0008150;GO:0009267;GO:0042149;GO:…	------	------	------	------	------	------	------	------	------	mitochondrial	1	7	18.7	Medium
Q6P1L8	39S ribosomal protein L14, mitochondrial OS=Homo sapiens OX=9606 GN=MRPL14 PE=1 SV=1	0.779022	-0.360263	0.00733	down	yes	0.765	0.982	BP:regulation of primary metabolic process;BP:regulation of metabolic process;BP:organic cyclic compound biosynthetic process;BP:cellular component organization or biogenesis;BP:peptide biosynthetic process;BP:regulation of macromolecule metabolic process;BP:regulation of RNA biosynthetic process;BP:heterocycle metabolic process;BP:organonitrogen compound metabolic process;BP:protein metabolic pr…	GO:0080090;GO:0019222;GO:1901362;GO:0071840;GO:0043043;GO:0060255;GO:2001141;GO:0046483;GO:1901564;GO:0019538;GO:0050789;GO:0097659;GO:1901576;GO:0044260;GO:0016043;GO:0065007;GO:1901360;GO:0018130;GO:0006139;GO:0009889;GO:0050794;GO:0008150;GO:0008152;GO:0019438;GO:0034654;GO:0016070;GO:0044271;GO:0006355;GO:0010556;GO:0006351;GO:0022411;GO:0006518;GO:0032774;GO:0044249;GO:0034641;GO:0034645;GO:…	K02874	RP-L14, MRPL14, rplN	hsa03010	Ribosome	------	------	PF00238.16	Ribosomal_L14	Ribosomal protein L14p/L23e	mitochondrial	2	20	15.9	High
O75558	Syntaxin-11 OS=Homo sapiens OX=9606 GN=STX11 PE=1 SV=1	0.736368	-0.441501	0.002815	down	yes	0.736	0.9995	BP:protein localization;BP:single-organism membrane organization;BP:vesicle fusion;BP:membrane fusion;BP:membrane organization;BP:signal transduction;BP:steroid hormone mediated signaling pathway;BP:regulation of biological process;BP:hormone-mediated signaling pathway;BP:intracellular receptor signaling pathway;BP:establishment of localization in cell;BP:androgen receptor signaling pathway;BP:si…	GO:0008104;GO:0044802;GO:0006906;GO:0061025;GO:0061024;GO:0007165;GO:0043401;GO:0050789;GO:0009755;GO:0030522;GO:0051649;GO:0030521;GO:1902589;GO:0016043;GO:0065007;GO:0071840;GO:0006810;GO:0071702;GO:0006886;GO:0033036;GO:0016192;GO:0015031;GO:0099500;GO:0009987;GO:0050794;GO:0045184;GO:0048278;GO:0008150;GO:0030518;GO:0045026;GO:0051234;GO:0051179;GO:0044801;GO:0006996;GO:0022406;GO:0044699;GO:…	K08487	STX11	hsa04130	SNARE interactions in vesicular transport	COG5074	U:Intracellular trafficking, secretion, and vesicular transport	PF00804.22	Syntaxin	Syntaxin	cytoplasmic	2	10	33.2	High
P00734	Prothrombin OS=Homo sapiens OX=9606 GN=F2 PE=1 SV=2	0.770174	-0.376744	0.008676	down	yes	0.754	0.979	BP:hemostasis;BP:regulation of transport;BP:blood coagulation, intrinsic pathway;BP:blood coagulation;BP:inorganic ion homeostasis;BP:regulation of phosphate metabolic process;BP:cytolysis in other organism;BP:cellular response to stimulus;BP:response to external biotic stimulus;BP:protein carboxylation;BP:negative regulation of response to stimulus;BP:regulation of cell shape;BP:regulation of ac…	GO:0007599;GO:0051049;GO:0007597;GO:0007596;GO:0098771;GO:0019220;GO:0051715;GO:0051716;GO:0043207;GO:0018214;GO:0048585;GO:0008360;GO:0002673;GO:0042325;GO:0042327;GO:0009607;GO:0009605;GO:0019538;GO:0017187;GO:0009892;GO:0009893;GO:0009891;GO:0050789;GO:0006888;GO:0002682;GO:0051873;GO:0022603;GO:2000379;GO:1903649;GO:2000377;GO:0043412;GO:0002526;GO:0010557;GO:0010556;GO:0051128;GO:1903827;GO:…	K01313	F2	hsa04080;hsa04610;hsa04810	Neuroactive ligand-receptor interaction;Complement and coagulation cascades;Regulation of actin cytoskeleton	COG5640	O:Posttranslational modification, protein turnover, chaperones	PF00089.23;PF00051.15;PF09396.7;PF00594.17	Trypsin;Kringle;Thrombin_light;Gla	Trypsin;Kringle domain;Thrombin light chain;Vitamin K-dependent carboxylation/gamma-carboxyglutamic	ER	8	11	70	High
O95359	Transforming acidic coiled-coil-containing protein 2 OS=Homo sapiens OX=9606 GN=TACC2 PE=1 SV=3	0.777663	-0.362782	0.02541	down	yes	0.7555	0.9715	BP:protein localization;BP:regulation of primary metabolic process;BP:regulation of metabolic process;BP:negative regulation of response to stimulus;BP:regulation of response to stimulus;BP:membrane fusion;BP:membrane organization;BP:secretion by cell;BP:cellular component organization or biogenesis;BP:single-organism catabolic process;BP:single-organism metabolic process;BP:response to inorganic…	GO:0008104;GO:0080090;GO:0019222;GO:0048585;GO:0048583;GO:0061025;GO:0061024;GO:0032940;GO:0071840;GO:0044712;GO:0044710;GO:0010035;GO:0010604;GO:0043207;GO:0071310;GO:0031401;GO:0044419;GO:0042981;GO:1903204;GO:0051817;GO:1903202;GO:1903201;GO:0048518;GO:0048519;GO:0033036;GO:0016192;GO:0019054;GO:0051053;GO:0051052;GO:0060255;GO:0060548;GO:0071315;GO:0045184;GO:0032268;GO:0071242;GO:0051701;GO:…	K14282	TACC2	------	------	------	------	PF05010.11	TACC	Transforming acidic coiled-coil-containing protein	cytoplasmic	1	1	309.2	High
P04004	Vitronectin OS=Homo sapiens OX=9606 GN=VTN PE=1 SV=1	0.746329	-0.422116	0.005143	down	yes	0.737	0.9875	BP:primary metabolic process;BP:regulation of phosphate metabolic process;BP:regulation of primary metabolic process;BP:regulation of metabolic process;BP:regulation of transport;BP:negative regulation of response to stimulus;BP:positive regulation of response to stimulus;BP:regulation of response to stimulus;BP:cell-matrix adhesion;BP:regulation of lymphocyte mediated immunity;BP:negative regula…	GO:0044238;GO:0019220;GO:0080090;GO:0019222;GO:0051049;GO:0048585;GO:0048584;GO:0048583;GO:0007160;GO:0002706;GO:0050819;GO:0002704;GO:0002703;GO:0016043;GO:0048260;GO:0031347;GO:0044710;GO:0010605;GO:0061302;GO:0045785;GO:0009966;GO:0009967;GO:0071840;GO:0050727;GO:0048513;GO:0044093;GO:0044092;GO:0048518;GO:0065007;GO:0034622;GO:0016192;GO:0010604;GO:2000258;GO:0031589;GO:0051050;GO:0060255;GO:…	K06251	VTN	hsa05205;hsa04512;hsa04610;hsa04510;hsa04151	Proteoglycans in cancer;ECM-receptor interaction;Complement and coagulation cascades;Focal adhesion;PI3K-Akt signaling pathway	------	------	PF00045.16;PF01033.14	Hemopexin;Somatomedin_B	Hemopexin;Somatomedin B domain	ER	3	10	54.3	High
Q9P296	C5a anaphylatoxin chemotactic receptor 2 OS=Homo sapiens OX=9606 GN=C5AR2 PE=1 SV=1	0.784679	-0.349825	0.02827	down	yes	0.758	0.966	BP:regulation of MAPK cascade;BP:regulation of phosphate metabolic process;BP:regulation of primary metabolic process;BP:regulation of metabolic process;BP:negative regulation of secretion;BP:regulation of transport;BP:negative regulation of response to stimulus;BP:positive regulation of response to stimulus;BP:regulation of response to stimulus;BP:regulation of chemotaxis;BP:signal transduction;…	GO:0043408;GO:0019220;GO:0080090;GO:0019222;GO:0051048;GO:0051049;GO:0048585;GO:0048584;GO:0048583;GO:0050920;GO:0007165;GO:0050922;GO:0098771;GO:0031347;GO:0051046;GO:0042330;GO:0050710;GO:0009966;GO:0009967;GO:0050727;GO:0048518;GO:0065007;GO:0032720;GO:0042127;GO:0038178;GO:0051051;GO:0002757;GO:0060255;GO:2000482;GO:2000257;GO:0032268;GO:0030162;GO:0002673;GO:0042325;GO:0042327;GO:0002429;GO:…	K04171	GPR77	------	------	------	------	PF00001.18	7tm_1	7 transmembrane receptor	plasma membrane	1	4	36.1	Medium
A0A2R8YEA7	Actin, cytoplasmic 1 (Fragment) OS=Homo sapiens OX=9606 GN=ACTB PE=1 SV=1	0.730885	-0.452283	0.04944	down	yes	0.7265	0.994	CC:cytoskeleton;CC:membrane;CC:intracellular non-membrane-bounded organelle;CC:dense body;CC:anchoring junction;CC:cell part;CC:cytoplasmic part;CC:cellular_component;CC:intracellular organelle;CC:non-membrane-bounded organelle;CC:adherens junction;CC:plasma membrane;CC:intracellular part;CC:cell-substrate adherens junction;CC:focal adhesion;CC:organelle;CC:cell junction;CC:cell-substrate junctio…	GO:0005856;GO:0016020;GO:0043232;GO:0097433;GO:0070161;GO:0044464;GO:0044444;GO:0005575;GO:0043229;GO:0043228;GO:0005912;GO:0005886;GO:0044424;GO:0005924;GO:0005925;GO:0043226;GO:0030054;GO:0030055	K05692	ACTB_G1	hsa05132;hsa05131;hsa05130;hsa04611;hsa04530;hsa04670;hsa04145;hsa04510;hsa05410;hsa05412;hsa05414;hsa04921;hsa05416;hsa05164;hsa04210;hsa05100;hsa05205;hsa04015;hsa04520;hsa04390;hsa04919;hsa04810;hsa05418;hsa05110	Salmonella infection;Shigellosis;Pathogenic Escherichia coli infection;Platelet activation;Tight junction;Leukocyte transendothelial migration;Phagosome;Focal adhesion;Hypertrophic cardiomyopath;Arrhythmogenic right ventricular cardiomyopath;Dilated cardiomyopathy;Oxytocin signaling pathway;Viral myocarditis;Influenza A;Apoptosis;Bacterial invasion of epithelial cells;Proteoglycans in cancer;Rap1…	COG5277	Z:Cytoskeleton	PF00022.16	Actin	Actin	cytoplasmic	1	76	17.5	High
Q9Y2L5	Trafficking protein particle complex subunit 8 OS=Homo sapiens OX=9606 GN=TRAPPC8 PE=1 SV=2	0.739879	-0.43464	0.008136	down	yes	0.731	0.988	BP:protein localization;BP:CUT metabolic process;BP:regulation of metabolic process;BP:cellular component organization or biogenesis;BP:organic cyclic compound catabolic process;BP:single-organism catabolic process;BP:single-organism metabolic process;BP:cellular macromolecule localization;BP:posttranscriptional regulation of gene expression;BP:macromolecule localization;BP:ncRNA processing;BP:re…	GO:0008104;GO:0071043;GO:0019222;GO:0071840;GO:1901361;GO:0044712;GO:0044710;GO:0070727;GO:0010608;GO:0033036;GO:0034470;GO:0060255;GO:0007030;GO:0006605;GO:0045184;GO:0046483;GO:0006807;GO:0034661;GO:0034660;GO:1901575;GO:0044265;GO:0006888;GO:0044260;GO:0006886;GO:0071034;GO:0016043;GO:0065007;GO:0006364;GO:0032258;GO:0065008;GO:0006810;GO:0006623;GO:0019439;GO:0044804;GO:0008150;GO:0008152;GO:…	K20305	TRAPPC8, TRS85	------	------	------	------	PF12739.4	TRAPPC-Trs85	ER-Golgi trafficking TRAPP I complex 85 kDa subunit	cytoplasmic	1	2	160.9	Medium
Q8N6H7	ADP-ribosylation factor GTPase-activating protein 2 OS=Homo sapiens OX=9606 GN=ARFGAP2 PE=1 SV=1	0.739615	-0.435154	0.0225	down	yes	0.73	0.987	BP:macromolecule localization;BP:protein localization;BP:signal transduction;BP:cell surface receptor signaling pathway;BP:regulation of hydrolase activity;BP:single-organism process;BP:ER to Golgi vesicle-mediated transport;BP:positive regulation of hydrolase activity;BP:regulation of GTPase activity;BP:regulation of biological process;BP:biological regulation;BP:positive regulation of catalytic…	GO:0033036;GO:0008104;GO:0007165;GO:0007166;GO:0051336;GO:0044699;GO:0006888;GO:0051345;GO:0043087;GO:0050789;GO:0065007;GO:0043085;GO:0044093;GO:0065009;GO:0022610;GO:0050790;GO:0048193;GO:0045184;GO:0006810;GO:0050794;GO:0044765;GO:0008150;GO:0071702;GO:0051649;GO:0007155;GO:0051234;GO:0051179;GO:1902578;GO:0016192;GO:0006890;GO:0046907;GO:0007229;GO:0043547;GO:1902582;GO:0015031;GO:0098636;GO:…	K12493	ARFGAP2_3	hsa04144	Endocytosis	COG5347	U:Intracellular trafficking, secretion, and vesicular transport	PF01412.15	ArfGap	Putative GTPase activating protein for Arf	cytoplasmic	1	3	56.7	High
Q9NUG6	p53 and DNA damage-regulated protein 1 OS=Homo sapiens OX=9606 GN=PDRG1 PE=1 SV=2	0.771458	-0.37434	0.03244	down	yes	0.746	0.967	BP:cardiac muscle tissue growth;BP:protein folding;BP:developmental growth;BP:regulation of homotypic cell-cell adhesion;BP:regulation of cell adhesion;BP:negative regulation of binding;BP:regulation of cell-cell adhesion;BP:negative regulation of cell adhesion;BP:heart trabecula morphogenesis;BP:anatomical structure morphogenesis;BP:regulation of biological process;BP:negative regulation of cell…	GO:0055017;GO:0006457;GO:0048589;GO:0034110;GO:0030155;GO:0051100;GO:0022407;GO:0007162;GO:0061384;GO:0009653;GO:0050789;GO:0022408;GO:0061383;GO:0032091;GO:0003206;GO:0040007;GO:0051240;GO:0055010;GO:0003209;GO:0009611;GO:0003222;GO:0065007;GO:0044699;GO:0048729;GO:0044092;GO:0048518;GO:0048519;GO:0065009;GO:0032502;GO:0032501;GO:0055008;GO:0034111;GO:0009987;GO:0042060;GO:0050794;GO:0044767;GO:…	------	------	------	------	------	------	PF01920.17	Prefoldin_2	Prefoldin subunit	cytoplasmic	1	10	15.5	Medium
F8VY04	Adenylate kinase 2, mitochondrial OS=Homo sapiens OX=9606 GN=AK2 PE=1 SV=1	0.707391	-0.499421	0.006276	down	yes	0.7035	0.9945	BP:protein localization;BP:nucleobase-containing small molecule metabolic process;BP:phosphorylation;BP:nucleotide metabolic process;BP:secretion by cell;BP:nitrogen compound metabolic process;BP:small molecule metabolic process;BP:organic cyclic compound metabolic process;BP:nucleobase-containing compound metabolic process;BP:single-organism metabolic process;BP:nucleotide phosphorylation;BP:org…	GO:0008104;GO:0055086;GO:0016310;GO:0009117;GO:0032940;GO:0006807;GO:0044281;GO:1901360;GO:0006139;GO:0044710;GO:0046939;GO:0071704;GO:0044699;GO:0006810;GO:0071702;GO:0019637;GO:0033036;GO:0009987;GO:0009306;GO:0006725;GO:0045184;GO:0044765;GO:0008150;GO:0008152;GO:0051234;GO:0051179;GO:1902578;GO:0046483;GO:0044238;GO:0046903;GO:0034641;GO:0044237;GO:0006796;GO:0006793;GO:0015031;GO:0044763;GO:…	------	------	------	------	COG0563	F:Nucleotide transport and metabolism	PF00406.19;PF05191.11;PF13207.3	ADK;ADK_lid;AAA_17	Adenylate kinase;Adenylate kinase, active site lid;AAA domain	cytoplasmic	1	62	21.2	High
P12074	Cytochrome c oxidase subunit 6A1, mitochondrial OS=Homo sapiens OX=9606 GN=COX6A1 PE=1 SV=4	0.74522	-0.424262	0.02044	down	yes	0.721	0.9675	BP:organic cyclic compound biosynthetic process;BP:organic cyclic compound metabolic process;BP:single-organism metabolic process;BP:electron transport chain;BP:respiratory electron transport chain;BP:oxidation-reduction process;BP:heterocycle metabolic process;BP:aromatic compound biosynthetic process;BP:aerobic respiration;BP:nucleic acid-templated transcription;BP:organic substance biosyntheti…	GO:1901362;GO:1901360;GO:0044710;GO:0022900;GO:0022904;GO:0055114;GO:0046483;GO:0019438;GO:0009060;GO:0097659;GO:1901576;GO:0015992;GO:0044260;GO:0065007;GO:0098662;GO:0098660;GO:0065009;GO:0018130;GO:0006818;GO:0006812;GO:0006811;GO:0006810;GO:0045333;GO:0008152;GO:0034654;GO:0051234;GO:0044271;GO:0015980;GO:0009058;GO:0006351;GO:0008150;GO:0032774;GO:1902600;GO:0044249;GO:0034641;GO:0034645;GO:…	K02266	COX6A	hsa00190;hsa04260;hsa04932;hsa05016;hsa05010;hsa05012	Oxidative phosphorylation;Cardiac muscle contraction;Non-alcoholic fatty liver diseas;Huntington's disease;Alzheimer's disease;Parkinson's disease	------	------	PF02046.12	COX6A	Cytochrome c oxidase subunit VIa	mitochondrial	1	27	12.1	High
O14777	Kinetochore protein NDC80 homolog OS=Homo sapiens OX=9606 GN=NDC80 PE=1 SV=1	0.723731	-0.466474	0.008821	down	yes	0.706	0.9755	BP:regulation of microtubule polymerization or depolymerization;BP:regulation of microtubule depolymerization;BP:regulation of primary metabolic process;BP:regulation of proteasomal ubiquitin-dependent protein catabolic process;BP:negative regulation of microtubule polymerization or depolymerization;BP:negative regulation of cytoskeleton organization;BP:regulation of mitotic sister chromatid sepa…	GO:0031110;GO:0031114;GO:0080090;GO:0032434;GO:0031111;GO:0051494;GO:0010965;GO:0051656;GO:1901362;GO:0040001;GO:0071840;GO:0010605;GO:0045787;GO:0051493;GO:0048518;GO:0048519;GO:0007088;GO:0007010;GO:0060255;GO:0051294;GO:0006366;GO:0051293;GO:1901880;GO:0030162;GO:2001141;GO:1902099;GO:0046483;GO:0034641;GO:0051783;GO:0019438;GO:0009894;GO:0098813;GO:0009892;GO:0009890;GO:1901879;GO:0090267;GO:…	K11547	NDC80, HEC1, TID3	------	------	COG5185	D:Cell cycle control, cell division, chromosome partitioning	PF03801.10	Ndc80_HEC	HEC/Ndc80p family	cytoplasmic	2	4	73.9	High
P23142	Fibulin-1 OS=Homo sapiens OX=9606 GN=FBLN1 PE=1 SV=4	0.731964	-0.450155	0.03831	down	yes	0.695	0.9495	BP:regulation of MAPK cascade;BP:regulation of transformation of host cell by virus;BP:regulation of phosphate metabolic process;BP:regulation of metabolic process;BP:regulation of ERK1 and ERK2 cascade;BP:negative regulation of secretion;BP:regulation of transport;BP:negative regulation of response to stimulus;BP:regulation of response to stimulus;BP:fatty acid metabolic process;BP:negative regu…	GO:0043408;GO:1904187;GO:0019220;GO:0019222;GO:0070372;GO:0051048;GO:0051049;GO:0048585;GO:0048583;GO:0006631;GO:0007162;GO:0044281;GO:0007166;GO:0044283;GO:1901362;GO:1901360;GO:0080090;GO:0044710;GO:0010605;GO:0010604;GO:0009968;GO:0045785;GO:0009966;GO:0048869;GO:0071840;GO:0044419;GO:0044711;GO:0044093;GO:0010721;GO:0048518;GO:0048519;GO:0051791;GO:0042127;GO:0042325;GO:1904188;GO:0051051;GO:…	K17307	FBLN1_2	------	------	------	------	PF07645.12;PF12662.4;PF12947.4;PF14670.3	EGF_CA;cEGF;EGF_3;FXa_inhibition	Calcium-binding EGF domain;Complement Clr-like EGF-like;EGF domain;Coagulation Factor Xa inhibitory site	extracellular	3	7	77.2	High
Q9ULF5	Zinc transporter ZIP10 OS=Homo sapiens OX=9606 GN=SLC39A10 PE=1 SV=2	0.692308	-0.530515	0.04626	down	yes	0.648	0.936	BP:regulation of phosphate metabolic process;BP:regulation of primary metabolic process;BP:regulation of metabolic process;BP:positive regulation of response to stimulus;BP:regulation of response to stimulus;BP:transition metal ion homeostasis;BP:inorganic ion homeostasis;BP:negative regulation of B cell apoptotic process;BP:regulation of B cell apoptotic process;BP:positive regulation of macromo…	GO:0019220;GO:0080090;GO:0019222;GO:0048584;GO:0048583;GO:0055076;GO:0098771;GO:0002903;GO:0002902;GO:0010604;GO:0009966;GO:0009967;GO:0043067;GO:0044093;GO:0048518;GO:0065007;GO:0010922;GO:0098662;GO:0042127;GO:0070228;GO:0060255;GO:0060548;GO:0032268;GO:0072511;GO:0048878;GO:0009893;GO:0050670;GO:0032946;GO:0032944;GO:0042981;GO:0050789;GO:0006829;GO:0046916;GO:0051345;GO:0006882;GO:0002684;GO:…	K14716	SLC39A10, ZIP10	------	------	COG0428	P:Inorganic ion transport and metabolism	PF02535.19	Zip	ZIP Zinc transporter	ER	1	2	94.1	Medium
A6NCE7	Microtubule-associated proteins 1A/1B light chain 3 beta 2 OS=Homo sapiens OX=9606 GN=MAP1LC3B2 PE=2 SV=1	0.605249	-0.724398	0.02264	down	yes	0.5765	0.9525	BP:regulation of metabolic process;BP:regulation of response to stimulus;BP:cellular component organization or biogenesis;BP:single-organism catabolic process;BP:cellular response to stimulus;BP:biological regulation;BP:cellular response to extracellular stimulus;BP:cellular response to nutrient levels;BP:response to external stimulus;BP:response to nutrient levels;BP:regulation of biological pro…	GO:0019222;GO:0048583;GO:0071840;GO:0044712;GO:0051716;GO:0065007;GO:0031668;GO:0031669;GO:0009605;GO:0031667;GO:0050789;GO:0033554;GO:1903146;GO:0009894;GO:0022607;GO:1903008;GO:0016043;GO:0007005;GO:0044710;GO:0050794;GO:0006950;GO:0008150;GO:0008152;GO:0050896;GO:0080135;GO:0022411;GO:0032107;GO:0032104;GO:0009267;GO:0033043;GO:0051128;GO:0010646;GO:0044699;GO:0043562;GO:0000045;GO:0071496;GO:…	K10435	MAP1LC	hsa04216	Ferroptosis	------	------	PF02991.13;PF04110.10	Atg8;APG12	Autophagy protein Atg8 ubiquitin like;Ubiquitin-like autophagy protein Apg12	cytoplasmic	1	6	14.6	Medium
